# Supplementary material for: Do Body Mass Index and Nutritional Risk Score 2002 Influence the In-Hospital Mortality of Patients Following Cardiac Arrest?
Source: MDPI journal article supplement (doi:10.3390/nu15020436), 2023-01-14
Supplement: s1 [file s1]

**Table S1.** Univariate logistic regression analyzing the odds of death among patients

| Variable                 | Analyzed cat.   | $\beta_i$ | $\beta_i$ SE | OR          | OR -95% CI | OR 95% CI | p            |
|--------------------------|-----------------|-----------|--------------|-------------|------------|-----------|--------------|
| Sex                      | Male            | -0.198    | 0.341        | 0.82        | 0.42       | 1.60      | 0.562        |
| Age [years]              | -               | 0.013     | 0.011        | 1.01        | 0.99       | 1.04      | 0.240        |
| BMI [kg/m <sup>2</sup> ] | -               | 0.023     | 0.028        | 1.02        | 0.97       | 1.08      | 0.417        |
| Obesity                  | Obese           | -0.020    | 0.378        | 0.98        | 0.47       | 2.06      | 0.957        |
| Cardiac arrest mechanism | VF/SvT          | -0.998    | 0.329        | <b>0.37</b> | 0.19       | 0.70      | <b>0.002</b> |
| Cardiac arrest location  | IHCA            | 0.189     | 0.319        | 1.21        | 0.65       | 2.26      | 0.553        |
| ACS                      | ACS             | -0.078    | 0.425        | 0.93        | 0.40       | 2.13      | 0.855        |
| Cerebral stroke          | Cerebral stroke | 0.328     | 0.582        | 1.39        | 0.44       | 4.34      | 0.573        |
| CKD                      | CKD             | -0.320    | 0.528        | 0.73        | 0.26       | 2.04      | 0.544        |
| Heart failure            | Heart failure   | 0.716     | 0.512        | 2.05        | 0.75       | 5.58      | 0.162        |
| Diabetes                 | Diabetes        | -0.313    | 0.369        | 0.73        | 0.35       | 1.51      | 0.396        |
| Hypertension             | Hypertension    | -0.296    | 0.330        | 0.74        | 0.39       | 1.42      | 0.370        |
| TG [mg/dl]               | -               | 0.001     | 0.001        | 1.00        | 1.00       | 1.00      | 0.368        |
| TChol [mg/dl]            | -               | -0.008    | 0.004        | 0.99        | 0.99       | 1.00      | 0.063        |
| Albumin [g/dl]           | -               | -0.491    | 0.248        | <b>0.61</b> | 0.38       | 1.00      | <b>0.048</b> |
| K [mmol/l]               | -               | 0.035     | 0.119        | 1.04        | 0.82       | 1.31      | 0.769        |
| Na [mmol/l]              | -               | 0.006     | 0.021        | 1.01        | 0.97       | 1.05      | 0.764        |
| hsCRP [mg/l]             | -               | 0.004     | 0.002        | 1.00        | 1.00       | 1.01      | 0.092        |
| Procalcitonine [ng/ml]   | -               | 0.003     | 0.006        | 1.00        | 0.99       | 1.01      | 0.609        |
| TSH [uIU/ml]             | -               | 0.125     | 0.091        | 1.13        | 0.95       | 1.36      | 0.170        |
| NRS2002                  | -               | -0.118    | 0.203        | 0.89        | 0.60       | 1.32      | 0.561        |

The 'Analyzed cat.' column features the categories, which are compared to their respective reference categories in terms of the odds of death.  $\beta_i$  - regression coefficient; SE - standard error; OR – odds ratio; CI - confidence interval. Abbreviations: ACS, Acute Coronary Syndrome; HF, heart failure; DM, diabetes mellitus; CKD, chronic kidney disease; CS, cerebral stroke; OHCA, out of hospital cardiac arrest; IHCA, in hospital cardiac arrest; PEA, Pulseless Electrical Activity; VF, ventricular fibrillation (VF); pVT, pulseless ventricular tachycardia; BMI, body mass index; HDL, high-density lipoprotein; K, potassium; LDL, low-density lipoprotein; NRS 2002, Nutritional Risk score; Na, sodium; PCT, procalcitonin; TC, total cholesterol; TG, triglycerides; TSH, thyroid-stimulating hormone; hsCRP, high-sensitivity C-reactive protein

**Table S2.** Process of iterative creation of the multivariate logistic regression model (Table 6: model 3)

| Step   | Effect (variable)        | df | Wald $\chi^2$ | Wald p | Score statistic | Score p | Variable status            |
|--------|--------------------------|----|---------------|--------|-----------------|---------|----------------------------|
| Step 1 | Sex                      | 1  | 1.70          | 0.192  |                 |         | Included                   |
|        | NRS2002 category         | 1  | 0.57          | 0.450  |                 |         | Included                   |
|        | Obesity                  | 1  | 0.28          | 0.595  |                 |         | Included                   |
|        | BMI category             | 2  | 2.46          | 0.293  |                 |         | Included                   |
|        | Cardiac arrest mechanism | 1  | 3.95          | 0.047  |                 |         | Included                   |
|        | Cardiac arrest location  | 1  | 0.08          | 0.777  |                 |         | Included                   |
|        | ACS                      | 1  | 0.70          | 0.403  |                 |         | Included                   |
|        | CS                       | 1  | 0.79          | 0.375  |                 |         | Included                   |
|        | CKD                      | 1  | 0.84          | 0.358  |                 |         | Included                   |
|        | HF                       | 1  | 2.12          | 0.145  |                 |         | Included                   |
|        | DM                       | 1  | 2.79          | 0.095  |                 |         | Included                   |
|        | HT                       | 1  | 0.07          | 0.786  |                 |         | Included                   |
|        | Age [years]              | 1  | 0.00          | 0.999  |                 |         | Excluded in this step      |
|        | NRS2002                  | 1  | 0.29          | 0.590  |                 |         | Included                   |
|        | BMI [kg/m <sup>2</sup> ] | 1  | 4.54          | 0.033  |                 |         | Included                   |
|        | Albumin [g/dl]           | 1  | 0.37          | 0.541  |                 |         | Included                   |
|        | K [mmol/l]               | 1  | 0.01          | 0.909  |                 |         | Included                   |
|        | Na [mmol/l]              | 1  | 0.51          | 0.475  |                 |         | Included                   |
|        | hsCRP [mg/l]             | 1  | 5.16          | 0.023  |                 |         | Included                   |
|        | Procalcitonine [ng/ml]   | 1  | 2.68          | 0.102  |                 |         | Included                   |
| Step 2 | Sex                      | 1  | 1.73          | 0.189  |                 |         | Included                   |
|        | NRS2002 category         | 1  | 0.68          | 0.410  |                 |         | Included                   |
|        | Obesity                  | 1  | 0.28          | 0.595  |                 |         | Included                   |
|        | BMI category             | 2  | 2.46          | 0.293  |                 |         | Included                   |
|        | Cardiac arrest mechanism | 1  | 4.37          | 0.037  |                 |         | Included                   |
|        | Cardiac arrest location  | 1  | 0.08          | 0.771  |                 |         | Included                   |
|        | ACS                      | 1  | 0.70          | 0.402  |                 |         | Included                   |
|        | CS                       | 1  | 0.79          | 0.374  |                 |         | Included                   |
|        | CKD                      | 1  | 0.86          | 0.353  |                 |         | Included                   |
|        | HF                       | 1  | 2.22          | 0.136  |                 |         | Included                   |
|        | DM                       | 1  | 2.79          | 0.095  |                 |         | Included                   |
|        | HT                       | 1  | 0.07          | 0.786  |                 |         | Included                   |
|        | Procalcitonine [ng/ml]   | 1  | 2.75          | 0.097  |                 |         | Included                   |
|        | NRS2002                  | 1  | 0.35          | 0.552  |                 |         | Included                   |
|        | BMI [kg/m <sup>2</sup> ] | 1  | 4.58          | 0.032  |                 |         | Included                   |
|        | Albumin [g/dl]           | 1  | 0.37          | 0.540  |                 |         | Included                   |
|        | K [mmol/l]               | 1  | 0.01          | 0.909  |                 |         | Excluded in this step      |
|        | Na [mmol/l]              | 1  | 0.52          | 0.472  |                 |         | Included                   |
|        | hsCRP [mg/l]             | 1  | 5.17          | 0.023  |                 |         | Included                   |
|        | Age [years]              | 1  |               |        | 0.00            | 0.999   | Excluded in previous steps |
| Step 3 | Sex                      | 1  | 1.72          | 0.190  |                 |         | Included                   |
|        | NRS2002 category         | 1  | 0.67          | 0.414  |                 |         | Included                   |
|        | Obesity                  | 1  | 0.40          | 0.529  |                 |         | Included                   |
|        | BMI category             | 2  | 2.46          | 0.292  |                 |         | Included                   |
|        | Cardiac arrest mechanism | 1  | 4.42          | 0.036  |                 |         | Included                   |
|        | Cardiac arrest location  | 1  | 0.08          | 0.778  |                 |         | Included                   |
|        | ACS                      | 1  | 0.69          | 0.406  |                 |         | Included                   |

| Step   | Effect (variable)        | df | Wald $\chi^2$ | Wald p | Score statistic | Score p | Variable status            |
|--------|--------------------------|----|---------------|--------|-----------------|---------|----------------------------|
|        | CS                       | 1  | 0.79          | 0.375  |                 |         | Included                   |
|        | CKD                      | 1  | 0.98          | 0.322  |                 |         | Included                   |
|        | HF                       | 1  | 2.31          | 0.128  |                 |         | Included                   |
|        | DM                       | 1  | 2.85          | 0.092  |                 |         | Included                   |
|        | HT                       | 1  | 0.07          | 0.789  |                 |         | Excluded in this step      |
|        | Procalcitonine [ng/ml]   | 1  | 2.76          | 0.097  |                 |         | Included                   |
|        | NRS2002                  | 1  | 0.35          | 0.555  |                 |         | Included                   |
|        | BMI [kg/m <sup>2</sup> ] | 1  | 5.07          | 0.024  |                 |         | Included                   |
|        | Albumin [g/dl]           | 1  | 0.36          | 0.547  |                 |         | Included                   |
|        | hsCRP [mg/l]             | 1  | 5.56          | 0.018  |                 |         | Included                   |
|        | Na [mmol/l]              | 1  | 0.55          | 0.457  |                 |         | Included                   |
|        | K [mmol/l]               | 1  |               |        | 0.01            | 0.909   | Excluded in previous steps |
|        | Age [years]              | 1  |               |        | <0.01           | 0.999   | Excluded in previous steps |
| Step 4 | Sex                      | 1  | 1.65          | 0.199  |                 |         | Included                   |
|        | NRS2002 category         | 1  | 0.67          | 0.412  |                 |         | Included                   |
|        | Obesity                  | 1  | 0.36          | 0.546  |                 |         | Included                   |
|        | BMI category             | 2  | 2.40          | 0.301  |                 |         | Included                   |
|        | Cardiac arrest mechanism | 1  | 4.41          | 0.036  |                 |         | Included                   |
|        | Cardiac arrest location  | 1  | 0.14          | 0.710  |                 |         | Excluded in this step      |
|        | ACS                      | 1  | 0.71          | 0.401  |                 |         | Included                   |
|        | CS                       | 1  | 0.80          | 0.372  |                 |         | Included                   |
|        | CKD                      | 1  | 0.92          | 0.338  |                 |         | Included                   |
|        | HF                       | 1  | 2.76          | 0.097  |                 |         | Included                   |
|        | DM                       | 1  | 2.99          | 0.084  |                 |         | Included                   |
|        | Na [mmol/l]              | 1  | 0.55          | 0.458  |                 |         | Included                   |
|        | Procalcitonine [ng/ml]   | 1  | 2.81          | 0.094  |                 |         | Included                   |
|        | NRS2002                  | 1  | 0.36          | 0.548  |                 |         | Included                   |
|        | BMI [kg/m <sup>2</sup> ] | 1  | 5.05          | 0.025  |                 |         | Included                   |
|        | Albumin [g/dl]           | 1  | 0.32          | 0.573  |                 |         | Included                   |
|        | hsCRP [mg/l]             | 1  | 5.50          | 0.019  |                 |         | Included                   |
|        | HT                       | 1  |               |        | 0.07            | 0.789   | Excluded in previous steps |
|        | K [mmol/l]               | 1  |               |        | 0.01            | 0.915   | Excluded in previous steps |
|        | Age [years]              | 1  |               |        | <0.01           | 0.991   | Excluded in previous steps |
| Step 5 | Sex                      | 1  | 1.58          | 0.208  |                 |         | Included                   |
|        | NRS2002 category         | 1  | 0.69          | 0.408  |                 |         | Included                   |
|        | Obesity                  | 1  | 0.38          | 0.535  |                 |         | Excluded in this step      |
|        | BMI category             | 2  | 2.33          | 0.312  |                 |         | Included                   |
|        | Cardiac arrest mechanism | 1  | 4.57          | 0.032  |                 |         | Included                   |
|        | hsCRP [mg/l]             | 1  | 5.68          | 0.017  |                 |         | Included                   |
|        | ACS                      | 1  | 0.77          | 0.379  |                 |         | Included                   |
|        | CS                       | 1  | 0.89          | 0.345  |                 |         | Included                   |
|        | CKD                      | 1  | 0.82          | 0.366  |                 |         | Included                   |
|        | HF                       | 1  | 2.88          | 0.090  |                 |         | Included                   |
|        | DM                       | 1  | 3.07          | 0.080  |                 |         | Included                   |
|        | Na [mmol/l]              | 1  | 0.57          | 0.449  |                 |         | Included                   |
|        | Procalcitonine [ng/ml]   | 1  | 2.73          | 0.098  |                 |         | Included                   |
|        | NRS2002                  | 1  | 0.43          | 0.511  |                 |         | Included                   |
|        | BMI [kg/m <sup>2</sup> ] | 1  | 5.01          | 0.025  |                 |         | Included                   |

| Step   | Effect (variable)        | df | Wald $\chi^2$ | Wald p | Score statistic | Score p | Variable status            |
|--------|--------------------------|----|---------------|--------|-----------------|---------|----------------------------|
|        | Albumin [g/dl]           | 1  | 0.47          | 0.492  |                 |         | Included                   |
|        | Cardiac arrest location  | 1  |               |        | 0.14            | 0.709   | Excluded in previous steps |
|        | HT                       | 1  |               |        | 0.13            | 0.718   | Excluded in previous steps |
|        | K [mmol/l]               | 1  |               |        | <0.01           | 0.944   | Excluded in previous steps |
|        | Age [years]              | 1  |               |        | 0.01            | 0.915   | Excluded in previous steps |
| Step 6 | Sex                      | 1  | 1.88          | 0.171  |                 |         | Included                   |
|        | NRS2002 category         | 1  | 0.61          | 0.434  |                 |         | Included                   |
|        | Albumin [g/dl]           | 1  | 0.64          | 0.425  |                 |         | Included                   |
|        | BMI category             | 2  | 3.69          | 0.158  |                 |         | Included                   |
|        | Cardiac arrest mechanism | 1  | 4.33          | 0.038  |                 |         | Included                   |
|        | hsCRP [mg/l]             | 1  | 5.43          | 0.020  |                 |         | Included                   |
|        | ACS                      | 1  | 0.91          | 0.341  |                 |         | Included                   |
|        | CS                       | 1  | 0.90          | 0.343  |                 |         | Included                   |
|        | CKD                      | 1  | 0.68          | 0.410  |                 |         | Included                   |
|        | HF                       | 1  | 2.61          | 0.106  |                 |         | Included                   |
|        | DM                       | 1  | 3.03          | 0.082  |                 |         | Included                   |
|        | Na [mmol/l]              | 1  | 0.67          | 0.414  |                 |         | Included                   |
|        | Procalcitonine [ng/ml]   | 1  | 2.90          | 0.089  |                 |         | Included                   |
|        | NRS2002                  | 1  | 0.39          | 0.534  |                 |         | Excluded in this step      |
|        | BMI [kg/m <sup>2</sup> ] | 1  | 4.79          | 0.029  |                 |         | Included                   |
|        | Obesity                  | 1  |               |        | 0.39            | 0.532   | Excluded in previous steps |
|        | Cardiac arrest location  | 1  |               |        | 0.16            | 0.691   | Excluded in previous steps |
|        | HT                       | 1  |               |        | 0.09            | 0.763   | Excluded in previous steps |
|        | K [mmol/l]               | 1  |               |        | 0.10            | 0.754   | Excluded in previous steps |
|        | Age [years]              | 1  |               |        | 0.02            | 0.883   | Excluded in previous steps |
| Step 7 | Sex                      | 1  | 1.57          | 0.210  |                 |         | Included                   |
|        | NRS2002 category         | 1  | 0.23          | 0.629  |                 |         | Excluded in this step      |
|        | Albumin [g/dl]           | 1  | 0.61          | 0.436  |                 |         | Included                   |
|        | BMI category             | 2  | 3.94          | 0.139  |                 |         | Included                   |
|        | Cardiac arrest mechanism | 1  | 4.52          | 0.033  |                 |         | Included                   |
|        | hsCRP [mg/l]             | 1  | 5.57          | 0.018  |                 |         | Included                   |
|        | ACS                      | 1  | 0.83          | 0.363  |                 |         | Included                   |
|        | CS                       | 1  | 1.07          | 0.301  |                 |         | Included                   |
|        | CKD                      | 1  | 0.51          | 0.475  |                 |         | Included                   |
|        | HF                       | 1  | 2.82          | 0.093  |                 |         | Included                   |
|        | DM                       | 1  | 3.21          | 0.073  |                 |         | Included                   |
|        | Na [mmol/l]              | 1  | 0.95          | 0.329  |                 |         | Included                   |
|        | Procalcitonine [ng/ml]   | 1  | 2.66          | 0.103  |                 |         | Included                   |
|        | BMI [kg/m <sup>2</sup> ] | 1  | 5.46          | 0.019  |                 |         | Included                   |
|        | NRS2002                  | 1  |               |        | 0.39            | 0.534   | Excluded in previous steps |
|        | Obesity                  | 1  |               |        | 0.34            | 0.560   | Excluded in previous steps |
|        | Cardiac arrest location  | 1  |               |        | 0.23            | 0.634   | Excluded in previous steps |
|        | HT                       | 1  |               |        | 0.13            | 0.722   | Excluded in previous steps |
|        | K [mmol/l]               | 1  |               |        | 0.06            | 0.799   | Excluded in previous steps |
|        | Age [years]              | 1  |               |        | 0.17            | 0.684   | Excluded in previous steps |
| Step 8 | Sex                      | 1  | 1.57          | 0.211  |                 |         | Included                   |
|        | BMI [kg/m <sup>2</sup> ] | 1  | 5.69          | 0.017  |                 |         | Included                   |
|        | Albumin [g/dl]           | 1  | 0.56          | 0.455  |                 |         | Included                   |

| Step    | Effect (variable)        | df | Wald $\chi^2$ | Wald p | Score statistic | Score p | Variable status            |
|---------|--------------------------|----|---------------|--------|-----------------|---------|----------------------------|
|         | BMI category             | 2  | 3.92          | 0.141  |                 |         | Included                   |
|         | Cardiac arrest mechanism | 1  | 4.88          | 0.027  |                 |         | Included                   |
|         | hsCRP [mg/l]             | 1  | 5.56          | 0.018  |                 |         | Included                   |
|         | ACS                      | 1  | 0.96          | 0.326  |                 |         | Included                   |
|         | CS                       | 1  | 1.16          | 0.282  |                 |         | Included                   |
|         | CKD                      | 1  | 0.47          | 0.491  |                 |         | Excluded in this step      |
|         | HF                       | 1  | 2.84          | 0.092  |                 |         | Included                   |
|         | DM                       | 1  | 3.35          | 0.067  |                 |         | Included                   |
|         | Na [mmol/l]              | 1  | 1.03          | 0.310  |                 |         | Included                   |
|         | Procalcitonine [ng/ml]   | 1  | 2.69          | 0.101  |                 |         | Included                   |
|         | NRS2002 category         | 1  |               |        | 0.23            | 0.628   | Excluded in previous steps |
|         | NRS2002                  | 1  |               |        | 0.01            | 0.934   | Excluded in previous steps |
|         | Obesity                  | 1  |               |        | 0.31            | 0.578   | Excluded in previous steps |
|         | Cardiac arrest location  | 1  |               |        | 0.14            | 0.706   | Excluded in previous steps |
|         | HT                       | 1  |               |        | 0.10            | 0.752   | Excluded in previous steps |
|         | K [mmol/l]               | 1  |               |        | 0.03            | 0.860   | Excluded in previous steps |
|         | Age [years]              | 1  |               |        | 0.17            | 0.678   | Excluded in previous steps |
| Step 9  | Sex                      | 1  | 1.61          | 0.204  |                 |         | Included                   |
|         | BMI [kg/m <sup>2</sup> ] | 1  | 5.29          | 0.021  |                 |         | Included                   |
|         | Albumin [g/dl]           | 1  | 0.64          | 0.423  |                 |         | Excluded in this step      |
|         | BMI category             | 2  | 3.67          | 0.160  |                 |         | Included                   |
|         | Cardiac arrest mechanism | 1  | 4.79          | 0.029  |                 |         | Included                   |
|         | hsCRP [mg/l]             | 1  | 5.29          | 0.021  |                 |         | Included                   |
|         | ACS                      | 1  | 0.92          | 0.338  |                 |         | Included                   |
|         | CS                       | 1  | 1.01          | 0.315  |                 |         | Included                   |
|         | Procalcitonine [ng/ml]   | 1  | 2.67          | 0.102  |                 |         | Included                   |
|         | HF                       | 1  | 2.92          | 0.087  |                 |         | Included                   |
|         | DM                       | 1  | 3.25          | 0.071  |                 |         | Included                   |
|         | Na [mmol/l]              | 1  | 1.00          | 0.317  |                 |         | Included                   |
|         | CKD                      | 1  |               |        | 0.48            | 0.489   | Excluded in previous steps |
|         | NRS2002 category         | 1  |               |        | 0.20            | 0.655   | Excluded in previous steps |
|         | NRS2002                  | 1  |               |        | 0.02            | 0.899   | Excluded in previous steps |
|         | Obesity                  | 1  |               |        | 0.20            | 0.651   | Excluded in previous steps |
|         | Cardiac arrest location  | 1  |               |        | 0.04            | 0.839   | Excluded in previous steps |
|         | HT                       | 1  |               |        | 0.02            | 0.902   | Excluded in previous steps |
|         | K [mmol/l]               | 1  |               |        | 0.12            | 0.734   | Excluded in previous steps |
|         | Age [years]              | 1  |               |        | 0.16            | 0.685   | Excluded in previous steps |
| Step 10 | Sex                      | 1  | 1.54          | 0.215  |                 |         | Included                   |
|         | BMI [kg/m <sup>2</sup> ] | 1  | 4.96          | 0.026  |                 |         | Included                   |
|         | Na [mmol/l]              | 1  | 0.79          | 0.375  |                 |         | Excluded in this step      |
|         | BMI category             | 2  | 3.50          | 0.174  |                 |         | Included                   |
|         | Cardiac arrest mechanism | 1  | 5.27          | 0.022  |                 |         | Included                   |
|         | hsCRP [mg/l]             | 1  | 6.64          | 0.010  |                 |         | Included                   |
|         | ACS                      | 1  | 1.00          | 0.318  |                 |         | Included                   |
|         | CS                       | 1  | 1.08          | 0.298  |                 |         | Included                   |
|         | Procalcitonine [ng/ml]   | 1  | 2.74          | 0.098  |                 |         | Included                   |
|         | HF                       | 1  | 3.42          | 0.064  |                 |         | Included                   |
|         | DM                       | 1  | 3.24          | 0.072  |                 |         | Included                   |

| Step    | Effect (variable)        | df | Wald $\chi^2$ | Wald p | Score statistic | Score p | Variable status            |
|---------|--------------------------|----|---------------|--------|-----------------|---------|----------------------------|
|         | Albumin [g/dl]           | 1  |               |        | 0.65            | 0.421   | Excluded in previous steps |
|         | CKD                      | 1  |               |        | 0.57            | 0.452   | Excluded in previous steps |
|         | NRS2002 category         | 1  |               |        | 0.15            | 0.699   | Excluded in previous steps |
|         | NRS2002                  | 1  |               |        | 0.01            | 0.925   | Excluded in previous steps |
|         | Obesity                  | 1  |               |        | 0.33            | 0.565   | Excluded in previous steps |
|         | Cardiac arrest location  | 1  |               |        | 0.16            | 0.689   | Excluded in previous steps |
|         | HT                       | 1  |               |        | 0.00            | 0.981   | Excluded in previous steps |
|         | K [mmol/l]               | 1  |               |        | 0.04            | 0.833   | Excluded in previous steps |
|         | Age [years]              | 1  |               |        | 0.17            | 0.676   | Excluded in previous steps |
| Step 11 | Sex                      | 1  | 1.70          | 0.192  |                 |         | Included                   |
|         | BMI [kg/m <sup>2</sup> ] | 1  | 4.75          | 0.029  |                 |         | Included                   |
|         | DM                       | 1  | 3.09          | 0.079  |                 |         | Included                   |
|         | BMI category             | 2  | 3.18          | 0.204  |                 |         | Included                   |
|         | Cardiac arrest mechanism | 1  | 5.28          | 0.022  |                 |         | Included                   |
|         | hsCRP [mg/l]             | 1  | 6.56          | 0.010  |                 |         | Included                   |
|         | ACS                      | 1  | 0.99          | 0.319  |                 |         | Included                   |
|         | CS                       | 1  | 0.94          | 0.332  |                 |         | Excluded in this step      |
|         | Procalcitonine [ng/ml]   | 1  | 2.76          | 0.097  |                 |         | Included                   |
|         | HF                       | 1  | 3.12          | 0.077  |                 |         | Included                   |
|         | Na [mmol/l]              | 1  |               |        | 0.82            | 0.366   | Excluded in previous steps |
|         | Albumin [g/dl]           | 1  |               |        | 0.46            | 0.499   | Excluded in previous steps |
|         | CKD                      | 1  |               |        | 0.52            | 0.470   | Excluded in previous steps |
|         | NRS2002 category         | 1  |               |        | 0.21            | 0.645   | Excluded in previous steps |
|         | NRS2002                  | 1  |               |        | <0.01           | 0.945   | Excluded in previous steps |
|         | Obesity                  | 1  |               |        | 0.40            | 0.529   | Excluded in previous steps |
|         | Cardiac arrest location  | 1  |               |        | 0.15            | 0.702   | Excluded in previous steps |
|         | HT                       | 1  |               |        | <0.01           | 0.968   | Excluded in previous steps |
|         | K [mmol/l]               | 1  |               |        | 0.14            | 0.706   | Excluded in previous steps |
|         | Age [years]              | 1  |               |        | 0.34            | 0.557   | Excluded in previous steps |
| Step 12 | Sex                      | 1  | 2.55          | 0.110  |                 |         | Included                   |
|         | BMI [kg/m <sup>2</sup> ] | 1  | 4.41          | 0.036  |                 |         | Included                   |
|         | DM                       | 1  | 2.38          | 0.123  |                 |         | Included                   |
|         | BMI category             | 2  | 2.72          | 0.256  |                 |         | Included                   |
|         | Cardiac arrest mechanism | 1  | 5.54          | 0.019  |                 |         | Included                   |
|         | hsCRP [mg/l]             | 1  | 6.58          | 0.010  |                 |         | Included                   |
|         | ACS                      | 1  | 1.16          | 0.282  |                 |         | Excluded in this step      |
|         | HF                       | 1  | 3.03          | 0.082  |                 |         | Included                   |
|         | Procalcitonine [ng/ml]   | 1  | 2.49          | 0.115  |                 |         | Included                   |
|         | CS                       | 1  |               |        | 0.96            | 0.327   | Excluded in previous steps |
|         | Na [mmol/l]              | 1  |               |        | 0.64            | 0.425   | Excluded in previous steps |
|         | Albumin [g/dl]           | 1  |               |        | 0.53            | 0.467   | Excluded in previous steps |
|         | CKD                      | 1  |               |        | 0.36            | 0.546   | Excluded in previous steps |
|         | NRS2002 category         | 1  |               |        | 0.29            | 0.593   | Excluded in previous steps |
|         | NRS2002                  | 1  |               |        | <0.01           | 0.958   | Excluded in previous steps |
|         | Obesity                  | 1  |               |        | 0.39            | 0.531   | Excluded in previous steps |
|         | Cardiac arrest location  | 1  |               |        | 0.31            | 0.578   | Excluded in previous steps |
|         | HT                       | 1  |               |        | 0.01            | 0.907   | Excluded in previous steps |
|         | K [mmol/l]               | 1  |               |        | 0.07            | 0.788   | Excluded in previous steps |

| Step    | Effect (variable)        | df | Wald $\chi^2$ | Wald p | Score statistic | Score p | Variable status            |
|---------|--------------------------|----|---------------|--------|-----------------|---------|----------------------------|
|         | Age [years]              | 1  |               |        | 0.45            | 0.505   | Excluded in previous steps |
| Step 13 | Sex                      | 1  | 2.30          | 0.129  |                 |         | Included                   |
|         | BMI [kg/m <sup>2</sup> ] | 1  | 4.39          | 0.036  |                 |         | Included                   |
|         | DM                       | 1  | 2.45          | 0.118  |                 |         | Included                   |
|         | BMI category             | 2  | 2.70          | 0.259  |                 |         | Excluded in this step      |
|         | Cardiac arrest mechanism | 1  | 5.24          | 0.022  |                 |         | Included                   |
|         | hsCRP [mg/l]             | 1  | 6.81          | 0.009  |                 |         | Included                   |
|         | Procalcitonine [ng/ml]   | 1  | 2.59          | 0.108  |                 |         | Included                   |
|         | HF                       | 1  | 2.54          | 0.111  |                 |         | Included                   |
|         | ACS                      | 1  |               |        | 1.17            | 0.278   | Excluded in previous steps |
|         | CS                       | 1  |               |        | 1.13            | 0.288   | Excluded in previous steps |
|         | Na [mmol/l]              | 1  |               |        | 0.64            | 0.425   | Excluded in previous steps |
|         | Albumin [g/dl]           | 1  |               |        | 0.63            | 0.429   | Excluded in previous steps |
|         | CKD                      | 1  |               |        | 0.29            | 0.588   | Excluded in previous steps |
|         | NRS2002 category         | 1  |               |        | 0.46            | 0.499   | Excluded in previous steps |
|         | NRS2002                  | 1  |               |        | 0.04            | 0.836   | Excluded in previous steps |
|         | Obesity                  | 1  |               |        | 0.59            | 0.444   | Excluded in previous steps |
|         | Cardiac arrest location  | 1  |               |        | 0.41            | 0.520   | Excluded in previous steps |
|         | HT                       | 1  |               |        | 0.02            | 0.878   | Excluded in previous steps |
|         | K [mmol/l]               | 1  |               |        | 0.03            | 0.864   | Excluded in previous steps |
|         | Age [years]              | 1  |               |        | 0.55            | 0.456   | Excluded in previous steps |
| Step 14 | Sex                      | 1  | 2.11          | 0.146  |                 |         | Included                   |
|         | BMI [kg/m <sup>2</sup> ] | 1  | 2.05          | 0.152  |                 |         | Excluded in this step      |
|         | DM                       | 1  | 2.54          | 0.111  |                 |         | Included                   |
|         | HF                       | 1  | 2.48          | 0.116  |                 |         | Included                   |
|         | Cardiac arrest mechanism | 1  | 5.33          | 0.021  |                 |         | Included                   |
|         | hsCRP [mg/l]             | 1  | 6.13          | 0.013  |                 |         | Included                   |
|         | Procalcitonine [ng/ml]   | 1  | 2.26          | 0.133  |                 |         | Included                   |
|         | BMI category             | 2  |               |        | 2.79            | 0.248   | Excluded in previous steps |
|         | ACS                      | 1  |               |        | 1.12            | 0.290   | Excluded in previous steps |
|         | CS                       | 1  |               |        | 0.51            | 0.477   | Excluded in previous steps |
|         | Na [mmol/l]              | 1  |               |        | 0.32            | 0.572   | Excluded in previous steps |
|         | Albumin [g/dl]           | 1  |               |        | 0.46            | 0.498   | Excluded in previous steps |
|         | CKD                      | 1  |               |        | 0.11            | 0.745   | Excluded in previous steps |
|         | NRS2002 category         | 1  |               |        | 0.42            | 0.515   | Excluded in previous steps |
|         | NRS2002                  | 1  |               |        | 0.01            | 0.926   | Excluded in previous steps |
|         | Obesity                  | 1  |               |        | 1.94            | 0.164   | Excluded in previous steps |
|         | Cardiac arrest location  | 1  |               |        | 0.29            | 0.590   | Excluded in previous steps |
|         | HT                       | 1  |               |        | 0.01            | 0.915   | Excluded in previous steps |
|         | K [mmol/l]               | 1  |               |        | 0.14            | 0.711   | Excluded in previous steps |
|         | Age [years]              | 1  |               |        | 0.47            | 0.492   | Excluded in previous steps |
| Step 15 | Sex                      | 1  | 2.29          | 0.130  |                 |         | Included                   |
|         | Procalcitonine [ng/ml]   | 1  | 2.75          | 0.097  |                 |         | Included                   |
|         | DM                       | 1  | 1.10          | 0.294  |                 |         | Excluded in this step      |
|         | HF                       | 1  | 3.11          | 0.078  |                 |         | Included                   |
|         | Cardiac arrest mechanism | 1  | 4.76          | 0.029  |                 |         | Included                   |
|         | hsCRP [mg/l]             | 1  | 5.81          | 0.016  |                 |         | Included                   |
|         | BMI [kg/m <sup>2</sup> ] | 1  |               |        | 2.11            | 0.146   | Excluded in previous steps |

| Step    | Effect (variable)        | df | Wald $\chi^2$ | Wald p | Score statistic | Score p | Variable status            |
|---------|--------------------------|----|---------------|--------|-----------------|---------|----------------------------|
|         | BMI category             | 2  |               |        | 0.02            | 0.991   | Excluded in previous steps |
|         | ACS                      | 1  |               |        | 1.06            | 0.304   | Excluded in previous steps |
|         | CS                       | 1  |               |        | 0.57            | 0.450   | Excluded in previous steps |
|         | Na [mmol/l]              | 1  |               |        | 0.47            | 0.495   | Excluded in previous steps |
|         | Albumin [g/dl]           | 1  |               |        | 0.17            | 0.678   | Excluded in previous steps |
|         | CKD                      | 1  |               |        | <0.01           | 0.970   | Excluded in previous steps |
|         | NRS2002 category         | 1  |               |        | 0.86            | 0.355   | Excluded in previous steps |
|         | NRS2002                  | 1  |               |        | <0.01           | 0.907   | Excluded in previous steps |
|         | Obesity                  | 1  |               |        | 0.00            | 0.945   | Excluded in previous steps |
|         | Cardiac arrest location  | 1  |               |        | 0.24            | 0.624   | Excluded in previous steps |
|         | HT                       | 1  |               |        | 0.07            | 0.787   | Excluded in previous steps |
|         | K [mmol/l]               | 1  |               |        | 0.20            | 0.656   | Excluded in previous steps |
|         | Age [years]              | 1  |               |        | 0.96            | 0.327   | Excluded in previous steps |
| Step 16 | Sex                      | 1  | 2.38          | 0.123  |                 |         | Excluded in this step      |
|         | Procalcitonine [ng/ml]   | 1  | 2.58          | 0.108  |                 |         | Included                   |
|         | hsCRP [mg/l]             | 1  | 5.44          | 0.020  |                 |         | Included                   |
|         | HF                       | 1  | 2.61          | 0.106  |                 |         | Included                   |
|         | Cardiac arrest mechanism | 1  | 4.90          | 0.027  |                 |         | Included                   |
|         | DM                       | 1  |               |        | 1.12            | 0.291   | Excluded in previous steps |
|         | BMI [kg/m <sup>2</sup> ] | 1  |               |        | 0.57            | 0.450   | Excluded in previous steps |
|         | BMI category             | 2  |               |        | 0.18            | 0.916   | Excluded in previous steps |
|         | ACS                      | 1  |               |        | 1.19            | 0.276   | Excluded in previous steps |
|         | CS                       | 1  |               |        | 0.11            | 0.741   | Excluded in previous steps |
|         | Na [mmol/l]              | 1  |               |        | 0.34            | 0.558   | Excluded in previous steps |
|         | Albumin [g/dl]           | 1  |               |        | 0.23            | 0.633   | Excluded in previous steps |
|         | CKD                      | 1  |               |        | 0.02            | 0.879   | Excluded in previous steps |
|         | NRS2002 category         | 1  |               |        | 0.77            | 0.379   | Excluded in previous steps |
|         | NRS2002                  | 1  |               |        | 0.01            | 0.905   | Excluded in previous steps |
|         | Obesity                  | 1  |               |        | 0.27            | 0.605   | Excluded in previous steps |
|         | Cardiac arrest location  | 1  |               |        | 0.25            | 0.617   | Excluded in previous steps |
|         | HT                       | 1  |               |        | 0.09            | 0.759   | Excluded in previous steps |
|         | K [mmol/l]               | 1  |               |        | 0.29            | 0.590   | Excluded in previous steps |
|         | Age [years]              | 1  |               |        | 0.57            | 0.451   | Excluded in previous steps |
| Step 17 | Cardiac arrest mechanism | 1  | 3.58          | 0.058  |                 |         | Included                   |
|         | Procalcitonine [ng/ml]   | 1  | 2.11          | 0.146  |                 |         | Excluded in this step      |
|         | hsCRP [mg/l]             | 1  | 5.13          | 0.024  |                 |         | Included                   |
|         | HF                       | 1  | 2.72          | 0.099  |                 |         | Included                   |
|         | Sex                      | 1  |               |        | 2.42            | 0.120   | Excluded in previous steps |
|         | DM                       | 1  |               |        | 1.21            | 0.271   | Excluded in previous steps |
|         | BMI [kg/m <sup>2</sup> ] | 1  |               |        | 0.65            | 0.422   | Excluded in previous steps |
|         | BMI category             | 2  |               |        | 0.07            | 0.966   | Excluded in previous steps |
|         | ACS                      | 1  |               |        | 0.98            | 0.323   | Excluded in previous steps |
|         | CS                       | 1  |               |        | 0.41            | 0.522   | Excluded in previous steps |
|         | Na [mmol/l]              | 1  |               |        | 0.42            | 0.519   | Excluded in previous steps |
|         | Albumin [g/dl]           | 1  |               |        | 0.16            | 0.689   | Excluded in previous steps |
|         | CKD                      | 1  |               |        | 0.04            | 0.850   | Excluded in previous steps |
|         | NRS2002 category         | 1  |               |        | 0.84            | 0.360   | Excluded in previous steps |
|         | NRS2002                  | 1  |               |        | 0.15            | 0.698   | Excluded in previous steps |



| Step    | Effect (variable)        | df | Wald $\chi^2$ | Wald p | Score statistic | Score p | Variable status            |
|---------|--------------------------|----|---------------|--------|-----------------|---------|----------------------------|
|         | Obesity                  | 1  |               |        | 0.27            | 0.605   | Excluded in previous steps |
|         | Cardiac arrest location  | 1  |               |        | 0.12            | 0.727   | Excluded in previous steps |
|         | HT                       | 1  |               |        | 0.34            | 0.561   | Excluded in previous steps |
|         | K [mmol/l]               | 1  |               |        | 0.32            | 0.573   | Excluded in previous steps |
|         | Age [years]              | 1  |               |        | 0.13            | 0.718   | Excluded in previous steps |
| Step 18 | Cardiac arrest mechanism | 1  | 6.03          | 0.014  |                 |         | Included                   |
|         | HF                       | 1  | 3.30          | 0.069  |                 |         | Included                   |
|         | hsCRP [mg/l]             | 1  | 5.50          | 0.019  |                 |         | Included                   |
|         | Procalcitonine [ng/ml]   | 1  |               |        | 2.59            | 0.108   | Excluded in previous steps |
|         | Sex                      | 1  |               |        | 2.55            | 0.110   | Excluded in previous steps |
|         | DM                       | 1  |               |        | 1.37            | 0.242   | Excluded in previous steps |
|         | BMI [kg/m <sup>2</sup> ] | 1  |               |        | 0.90            | 0.343   | Excluded in previous steps |
|         | BMI category             | 2  |               |        | 0.16            | 0.924   | Excluded in previous steps |
|         | ACS                      | 1  |               |        | 0.83            | 0.362   | Excluded in previous steps |
|         | CS                       | 1  |               |        | 0.25            | 0.614   | Excluded in previous steps |
|         | Na [mmol/l]              | 1  |               |        | 0.68            | 0.408   | Excluded in previous steps |
|         | Albumin [g/dl]           | 1  |               |        | 0.23            | 0.633   | Excluded in previous steps |
|         | CKD                      | 1  |               |        | 0.08            | 0.783   | Excluded in previous steps |
|         | NRS2002 category         | 1  |               |        | 0.95            | 0.330   | Excluded in previous steps |
|         | NRS2002                  | 1  |               |        | 0.43            | 0.511   | Excluded in previous steps |
|         | Obesity                  | 1  |               |        | 0.30            | 0.583   | Excluded in previous steps |
|         | Cardiac arrest location  | 1  |               |        | 0.02            | 0.888   | Excluded in previous steps |
|         | HT                       | 1  |               |        | 0.57            | 0.449   | Excluded in previous steps |
|         | K [mmol/l]               | 1  |               |        | 0.44            | 0.509   | Excluded in previous steps |
|         | Age [years]              | 1  |               |        | 0.00            | 0.944   | Excluded in previous steps |

Abbreviations: ACS, Acute Coronary Syndrome; HF, heart failure; DM, diabetes mellitus; CKD, chronic kidney disease; CS, cerebral stroke; OHCA, out of hospital cardiac arrest; IHCA, in hospital cardiac arrest; PEA, Pulseless Electrical Activity; VF, ventricular fibrillation (VF); pVT, pulseless ventricular tachycardia; BMI, body mass index; HDL, high-density lipoprotein; K, potassium; LDL, low-density lipoprotein; NRS 2002, Nutritional Risk score; Na, sodium; PCT, procalcitonin; TC, total cholesterol; TG, triglycerides; TSH, thyroid-stimulating hormone; hsCRP, high-sensitivity C-reactive protein

**Table S3.** Univariate Cox proportional hazard regression

| Variable                 | Analyzed cat.      | $\beta_i$ | $\beta_i$ SE | HR            | HR -95% CI | HR 95% CI | p            |
|--------------------------|--------------------|-----------|--------------|---------------|------------|-----------|--------------|
| TG [mg/dl]               | -                  | 0.002     | 0.001        | <b>1.0023</b> | 1.0004     | 1.0043    | <b>0.017</b> |
| hsCRP [mg/l]             | -                  | 0.003     | 0.001        | <b>1.0034</b> | 1.0006     | 1.0063    | <b>0.018</b> |
| Albumin [g/dl]           | -                  | -0.294    | 0.158        | 0.7452        | 0.5471     | 1.0149    | 0.062        |
| Cardiac arrest mechanism | Asystole/PEA       | 0.186     | 0.110        | 1.4495        | 0.9401     | 2.2349    | 0.093        |
| Diabetes                 | No diabetes        | 0.188     | 0.127        | 1.4554        | 0.8857     | 2.3918    | 0.139        |
| Na [mmol/l]              | -                  | 0.018     | 0.014        | 1.0183        | 0.9915     | 1.0458    | 0.182        |
| K [mmol/l]               | -                  | 0.089     | 0.071        | 1.0933        | 0.9508     | 1.2572    | 0.211        |
| Age [years]              | -                  | 0.008     | 0.007        | 1.0083        | 0.9941     | 1.0226    | 0.252        |
| TSH [uIU/ml]             | -                  | 0.035     | 0.030        | 1.0354        | 0.9754     | 1.0991    | 0.254        |
| TChol [mg/dl]            | -                  | -0.003    | 0.003        | 0.9967        | 0.9910     | 1.0025    | 0.263        |
| Cardiac arrest location  | OHCA               | -0.116    | 0.105        | 0.7935        | 0.5249     | 1.1996    | 0.273        |
| Hypertension             | No hypertension    | 0.102     | 0.110        | 1.2268        | 0.7957     | 1.8915    | 0.355        |
| Heart failure            | No heart failure   | -0.114    | 0.141        | 0.7957        | 0.4572     | 1.3848    | 0.419        |
| NRS2002                  | -                  | -0.092    | 0.136        | 0.9124        | 0.6987     | 1.1915    | 0.501        |
| Procalcitonine [ng/ml]   | -                  | 0.002     | 0.003        | 1.0018        | 0.9961     | 1.0076    | 0.536        |
| CKD                      | No CKD             | 0.114     | 0.185        | 1.2555        | 0.6073     | 2.5957    | 0.539        |
| Obesity                  | Non-obese          | 0.061     | 0.125        | 1.1297        | 0.6929     | 1.8417    | 0.625        |
| Sex                      | Female             | 0.040     | 0.110        | 1.0835        | 0.7053     | 1.6645    | 0.714        |
| Cerebral stroke          | No cerebral stroke | -0.061    | 0.176        | 0.8860        | 0.4451     | 1.7637    | 0.730        |
| ACS                      | No ACS             | 0.042     | 0.142        | 1.0878        | 0.6244     | 1.8949    | 0.766        |
| BMI [kg/m <sup>2</sup> ] | -                  | 0.003     | 0.016        | 1.0028        | 0.9712     | 1.0353    | 0.866        |

The 'Analyzed cat.' column features the categories, which are compared to their respective reference categories in terms of the hazard function values.  $\beta_i$  - regression coefficient; SE - standard error; HR - hazard ratio; CI - confidence interval. Abbreviations: Abbreviations: ACS, Acute Coronary Syndrome; HF, heart failure; DM, diabetes mellitus; CKD, chronic kidney disease; CS, cerebral stroke; OHCA, out of hospital cardiac arrest; IHCA, in hospital cardiac arrest; PEA, Pulseless Electrical Activity; VF, ventricular fibrillation (VF); pVT, pulseless ventricular tachycardia; BMI, body mass index; HDL, high-density lipoprotein; K, potassium; LDL, low-density lipoprotein; NRS 2002, Nutritional Risk score; Na, sodium; PCT, procalcitonin; TC, total cholesterol; TG, triglycerides; TSH, thyroid-stimulating hormone; hsCRP, high-sensitivity C-reactive protein
